# Supplementary material for: A Systematic Review of the Amount of Water per Person per Day Needed to Prevent Morbidity and Mortality in (Post-)Disaster Settings
Source: PubMed Central journal article supplement (PMC4427459; doi:10.1371/journal.pone.0126395), 2015-05-11
Supplement: pone.0126395.s002.pdf [file pone.0126395.s002.pdf]

## Supporting information

### Appendix 2 Search strategies

The following search formula was used for searching MEDLINE:

1. "Disasters"[Mesh] OR Disaster\*[TIAB]
2. "Droughts"[Mesh] OR drought\*[TIAB] OR "Cyclonic Storms"[Mesh] OR hurricane\*[TIAB] OR "Floods"[Mesh] OR flood\*[TIAB] OR "Fires"[Mesh] OR forest fire\*[TIAB]
3. "Geological Processes"[Mesh] OR tidal wave\*[TIAB] OR volcanic eruption\*[TIAB] OR tsunami\*[TIAB] OR landslide\*[TIAB] OR avalanche\*[TIAB] OR earthquake\*[TIAB] OR Storm\*[TIAB] OR wildfire\*[TIAB] OR Snowstorm\*[TIAB] OR heat wave\*[TIAB] OR cold wave\*[TIAB] OR land fire\*[TIAB] OR Sandstorm\*[TIAB] OR cyclone\*[TIAB] OR typhoon\*[TIAB] OR "Extreme Heat"[Mesh] OR "Extreme Cold"[Mesh] OR extreme heat\*[TIAB] OR extreme cold\*[TIAB] OR extreme temperature\*[TIAB]
4. "Refugees"[Mesh] OR Camp[TIAB] OR camps[TIAB] OR refugee\*[TIAB] OR internally displaced[TIAB]
5. 1-4 OR
6. "Water"[Mesh] OR "Drinking Water"[Mesh] OR "Drinking"[Mesh]
7. Water amount\*[TIAB] OR water quantit\*[TIAB] OR (availab\* AND water[TIAB]) OR (Drink\* AND water[TIAB])
8. "Water Supply"[Mesh:noexp] OR water suppl\*[TIAB]
9. "Water Deprivation"[Mesh] OR "Sanitation"[Mesh] OR water shortage\*[TIAB] OR water deprivation\*[TIAB] OR water scarcity[TIAB]
10. 6-9 OR
11. "Diarrhea"[Mesh] OR diarrhea\*[TIAB] OR diarrhoea\*[TIAB] OR "Cholera"[Mesh] OR cholera[TIAB] OR "Dysentery"[Mesh] OR dysentery[TIAB]
12. "Mortality"[Mesh] OR "Morbidity"[Mesh] OR infection\*[TIAB] OR infectious\*[TIAB] OR dehydration[TIAB]
13. "Communicable Diseases"[Mesh] OR microorganism\*[TIAB] OR parasite\*[TIAB] OR virus\*[TIAB] OR pathogen\*[TIAB] OR bacteria[TIAB] OR disease[TIAB] OR diseases[TIAB]

14. "Quality of Life"[Mesh] OR "Health Status"[Mesh] OR "Health Status Indicators"[Mesh] OR "Health"[Mesh] OR "Malaria"[Mesh] OR "Respiratory Tract Diseases"[Mesh] OR "Delivery of Health Care"[Mesh]
15. 11-14 OR
16. 5 AND 10 AND 15

The following search formula was used in EMBASE:

1. 'disaster'/exp OR disaster\*:ab,ti
2. 'avalanche'/exp OR avalanche\*:ab,ti OR 'earthquake'/exp OR earthquake\*:ab,ti OR 'tsunami'/exp OR tsunami\*:ab,ti OR 'drought'/exp OR drought\*:ab,ti OR 'volcano'/exp OR (volcanic NEXT/1 eruption\*):ab,ti OR 'landslide'/exp OR landslide\*:ab,ti
3. flood\*:ab,ti OR (forest NEXT/1 fire\*):ab,ti OR (tidal NEXT/1 wave\*):ab,ti OR hurricane\*:ab,ti OR (land NEXT/1 fire\*):ab,ti OR (cold NEXT/1 wave\*):ab,ti OR (heat NEXT/1 wave\*):ab,ti OR sandstorm\*:ab,ti OR snowstorm\*:ab,ti OR wildfire\*:ab,ti OR storm\*:ab,ti OR cyclone\*:ab,ti OR typhoon\*:ab,ti OR (extreme NEXT/1 cold\*):ab,ti OR (extreme NEXT/1 heat\*):ab,ti OR (extreme NEXT/1 temperature\*):ab,ti
4. 'refugee'/exp OR camps:ab,ti OR camp:ab,ti OR refugee\*:ab,ti OR (internally NEXT/1 displaced):ab,ti
5. 1-4 OR
6. 'water'/de OR 'water standard'/exp OR 'drinking water'/exp OR 'drinking'/exp
7. (water:ab,ti AND amount\*:ab,ti) OR (water:ab,ti AND quantit\*:ab,ti) OR (drink\*:ab,ti AND water:ab,ti) OR (availab\*:ab,ti AND water:ab,ti)
8. 'water supply'/exp OR 'tap water'/exp OR (water:ab,ti AND suppl\*:ab,ti)
9. 'water deprivation'/exp OR 'sanitation':ab,ti OR (water:ab,ti AND shortage\*:ab,ti) OR (water NEXT/1 deprivation\*):ab,ti OR (water NEXT/1 scarcity):ab,ti
10. 6-9 OR
11. 'diarrhea'/exp OR diarrohea\*:ab,ti OR diarrhea\*:ab,ti OR diarrhoea\*:ab,ti OR 'cholera'/exp OR 'dysentery'/exp OR cholera:ab,ti OR dysentery:ab,ti
12. 'mortality'/exp OR 'morbidity'/exp OR infectious\*:ab,ti OR infection\*:ab,ti OR dehydration:ab,ti
13. 'communicable disease'/exp OR pathogen\*:ab,ti OR virus\*:ab,ti OR parasite\*:ab,ti OR microorganism\*:ab,ti OR bacteria:ab,ti OR diseases:ab,ti OR disease:ab,ti

14. 'quality of life'/exp OR 'health status'/exp OR 'health survey'/exp OR 'health'/exp OR 'malaria'/exp OR  
'respiratory tract disease'/exp OR 'health care delivery'/exp

15. 11-14 OR

16. 5 AND 10 AND 15

In The Cochrane Library the following search formula was used:

1. [mh Disasters] OR disaster\*:ti,ab,kw
2. [mh Floods] OR [mh Fires] OR [mh “Cyclonic Storms”] OR forest fire\*:ti,ab,kw OR tidal wave\*:ti,ab,kw OR hurricane\*:ti,ab,kw OR drought\*:ti,ab,kw
3. [mh “Geological Processes”] OR avalanche\*:ti,ab,kw OR landslide\*:ti,ab,kw OR tsunami\*:ti,ab,kw OR volcanic eruption\*:ti,ab,kw OR earthquake\*:ti,ab,kw OR cyclone\*:ti,ab,kw OR [mh “extreme heat”] OR extreme heat\*:ti,ab,kw OR [mh “extreme cold”] OR extreme cold\*:ti,ab,kw OR extreme temperature\*:ti,ab,kw
4. [mh Refugees] OR camp:ti,ab,kw OR camps:ti,ab,kw OR refugee\*:ti,ab,kw OR internally displaced:ti,ab,kw
5. 1 - 4 OR
6. [mh Water] OR water amount\*:ti,ab,kw OR water shortage\*:ti,ab,kw OR water scarcity:ti,ab,kw
7. [mh Drinking] OR [mh “Drinking Water”] OR drinking water:ti,ab,kw OR drinking:ti,ab,kw
8. [mh “Water Supply”] OR water suppl\*:ti,ab,kw
9. [mh Sanitation] OR [mh “Water Deprivation”] OR water deprivation:ti,ab,kw
10. 6 - 9 OR

5 AND 10
