# Supplementary material for: A Systematic Review of the Amount of Water per Person per Day Needed to Prevent Morbidity and Mortality in (Post-)Disaster Settings
Source: PubMed Central journal article supplement (PMC4427459; doi:10.1371/journal.pone.0126395), 2015-05-11
Supplement: pone.0126395.s003.pdf [file pone.0126395.s003.pdf]

1 **Supporting information**

2 **Appendix 3** Table of excluded studies and reason for exclusion

| <b>Reference</b>                                       | <b>Reason for exclusion</b> |                                              |
|--------------------------------------------------------|-----------------------------|----------------------------------------------|
| Abbott D et al., 2000                                  | Design                      | Overview of interventions in California      |
| Abouteir A et al., 2011                                | Intervention                | Amount of water was not mentioned            |
| Abu Mourad TA., 2004                                   | Intervention                | Amount of water was not mentioned            |
| Aitken et al., 2010                                    | Intervention                | Amount of water was not mentioned            |
| Allwood P, et al, 2014                                 | Intervention                | Amount of water was not mentioned            |
| Amato RL et al., 2001                                  | Intervention                | Amount of water was not mentioned            |
| Anand JK, 1995                                         | Design                      | Comment/letter                               |
| Atuyambe LM et al., 2011                               | Intervention                | Total amount of water was not mentioned      |
| Barnes J, 1971                                         | Design                      | Correspondence                               |
| Bechen R. et al. 1996                                  | Design                      | Opinion pieces                               |
| Berro et al., 2004                                     | Intervention                | Amount of water was not mentioned            |
| Bhave SY, et al, 2005                                  | Intervention                | Amount of water was not mentioned            |
| Bhunia R, et al, 2011                                  | Intervention                | Amount of water was not mentioned            |
| Bile K.M et al., 2010                                  | Intervention                | Amount of water was not mentioned            |
| Brana AM, et al, 2013                                  | Design                      | Conference abstract                          |
| Brodie M et al., 2006                                  | Intervention                | Amount of water was not mentioned            |
| Brown C et al., 2011                                   | Intervention                | Amount of water was not mentioned            |
| Brown CM et al, 2014                                   | Design                      | Editorial                                    |
| Brown V, et al, 2002                                   | Design                      | Narrative review                             |
| Burki T, 2013                                          | Design                      | Newsdesk WHO                                 |
| Bwire G, et al, 2013                                   | Intervention                | Water supply not mentioned                   |
| Campuzano CP, et al, 2014                              | Language                    | Spanish                                      |
| Carmichael C, et al, 2013                              | Intervention                | Amount of water was not mentioned            |
| Centers for Disease Control and Prevention (CDC) 2011  | Intervention                | Amount of water was not mentioned            |
| Centers for Disease Control and prevention (CDC), 2003 | Design                      | Weekly report                                |
| Cerda R, et al, 2013                                   | Design                      | Comment                                      |
| Chin SH, et al, 2013                                   | Design                      | Conference abstract                          |
| Counts CS et al., 2001                                 | Intervention                | Water supply was not mentioned               |
| Craig-Gray R, 2012                                     | Design                      | Case report                                  |
| Cronin AA et al., 2009                                 | Design                      | No comparison                                |
| Cyranoski D, 2011                                      | Design                      | News report                                  |
| De Ville de Goyet C et al., 2001                       | Language                    | Spanish                                      |
| Deebaj R et al., 2011                                  | Intervention                | Amount of water was not mentioned            |
| Doocy S et al., 2006                                   | Intervention                | Disinfectants compared with no disinfectants |
| Drazen JM et al, 2005                                  | Design                      | Editorial                                    |
| Drysdale S et al., 2000                                | Intervention                | Not objective on water amount                |
| Dunkle SE, et al, 2011                                 | Design                      | Conference abstract                          |
| Englande AJ Jr., 2008                                  | Intervention                | Amount of water was not mentioned            |
| Ferrier et al., 2007                                   | Design                      | Opinion piece                                |
| Frist WH, et al, 2005                                  | Design                      | Perspective                                  |
| Gambhir RS, et al, 2013                                | Other                       | Full text not available                      |
| Gelting R, et al, 2013                                 | Design                      | Narrative review                             |
| Gerald BL, 2005                                        | Intervention                | Amount of water was not mentioned            |

|                              |              |                                               |
|------------------------------|--------------|-----------------------------------------------|
| Grandesso F, et al, 2014     | Intervention | Amount of water was not mentioned             |
| Gulland A. et al., 2012      | Design       | Opinion piece                                 |
| Holt E, et al, 2014          | Design       | News                                          |
| Howie et al., 1979           | Design       | Interview                                     |
| Hurlimann A.C et al., 2009   | Design       | Review on willingness to pay for water        |
| Jafari N. et al., 2011       | Intervention | Amount of water was not mentioned             |
| Jafri T.K et al., 2012       | Intervention | Amount of water was not mentioned             |
| Javaid C, et al, 2012        | Design       | general review                                |
| Karmakar S et al., 2008      | Intervention | Amount of water was not mentioned             |
| Khan MU, et al, 1982         | Intervention | Amount of water was not mentioned             |
| Kirsch TD, et al, 2010       | Intervention | Amount of water was not mentioned             |
| Krcmery V et al., 2010       | Intervention | Amount of water was not mentioned             |
| Kumar T, et al, 2013         | Design       | Conference abstract                           |
| Kunii O et al., 2002         | Intervention | Amount of water was not mentioned             |
| Kwanbunjan K et al., 2006    | Intervention | Amount of water was not mentioned             |
| Lantagne D, et al, 2013      | Intervention | Amount of water was not mentioned             |
| Lantagne D, et al, 2014      | Design       | Study on the source of cholera                |
| Li S et al., 1998            | Language     | Chinese                                       |
| Ligon BL, 2006               | Design       | Review, do not mentioned the amount of water  |
| Lim JH, 2005                 | Intervention | Amount of water was not mentioned             |
| Linscott A.J. et al., 2007   | Intervention | Amount of water was not mentioned             |
| Loewenberg S, et al, 2014    | Design       | News report                                   |
| Lumley J, et al, 2006        | Design       | Editorial                                     |
| Malilay J. et al., 2000      | Design       | Review on multidisciplinary approach          |
| Moll DM et al., 2007         | Intervention | Amount of water was not mentioned             |
| Mondal et al., 2001          | Intervention | Amount of water was not mentioned             |
| Moors E, et al, 2013         | Population   | Study on climat change                        |
| Noji et al., 2005            | Design       | Opinion piece                                 |
| Onishchenko G.G et al., 2001 | Language     | Russian                                       |
| Oswald WE et al., 2008       | Design       | No comparison                                 |
| Parmar P, et al, 2013        | Intervention | Study on emergency care and disaster response |
| Pawar AT et al., 2005        | Intervention | Amount of water was not mentioned             |
| Pfrimmer DM, 2010            | Design       | Clinical update                               |
| Pinera JF et al., 2009       | Outcome      | Health effects were not mentioned             |
| Rapaic M, 1972               | Language     | Croatian                                      |
| Rashid SF, 2009              | Intervention | Amount of water was not mentioned             |
| Rebaudet S, et al, 2013      | Intervention | Amount of water was not mentioned             |
| Schuller M, et al, 2014      | Intervention | Amount of water was not mentioned             |
| Scobie H, et al, 2013        | Design       | Conference abstract                           |
| Shabir O, 2013               | Intervention | Amount of water was not mentioned             |
| Smilkstein G, 1981           | Design       | Narrative review                              |
| Sorenson S.B. et al., 2011   | Intervention | Amount of water was not mentioned             |
| Sumner SA, et al, 2013       | Intervention | Amount of water was not mentioned             |
| Tamason C, et al, 2013       | Design       | Conference abstract                           |
| Tappero JW et al., 2011      | Design       | Opinion piece                                 |
| Tokuda K, et al, 2014        | Intervention | Amount of water was not mentioned             |
| Toole M.J. et al., 1995      | Intervention | Amount of water was not mentioned             |
| Toole M.J. et al., 1997      | Design       | Review on public health effects               |
| Ueda S et al., 2012          | Intervention | Amount of water was not mentioned             |

|                            |              |                                              |
|----------------------------|--------------|----------------------------------------------|
| Van Poppel et al., 1997    | Design       | Narrative review                             |
| Vandavelde T et al., 2002  | Design       | Opinion piece                                |
| Venturi L et al., 2011     | Design       | Case study                                   |
| Wampler P, et al, 2011     | Design       | Correspondence                               |
| Wang G.-S. et al., 2001    | Language     | Chinese                                      |
| Waring SC et al., 2005     | Intervention | Amount of water was not mentioned            |
| Watson J.T et al., 2007    | Design       | Review on risk factors for disease outbreaks |
| Wilderer PA, 2004          | Design       | Review on interventions                      |
| Wisitwong A et al., 2010   | Intervention | Amount of water was not mentioned            |
| Woersching JC et al., 2003 | Intervention | Amount of water was not mentioned            |
| Wu J et al., 2011          | Intervention | Amount of water was not mentioned            |
| Zabaneh JE et al., 2008    | Intervention | Amount of water was not mentioned            |
| Zeng et al., 2008          | Design       | Opinion piece; narrative review              |
| Zhou Y, et al, 2013        | Language     | Chinese                                      |

1

2
